# Supplementary material
Source: MDPI journal article supplement (https://www.mdpi.com/2297-8739/9/8/210)
Supplement: s1 [file s1]

# Supplementary Materials

## Aqueous extracts of fish roe as a source of several bioactive compounds

**Marta Guedes 1,2, Virgínia M. F. Gonçalves 3, Maria Elizabeth Tiritan 3,4,5,\* , Rui L. Reis 1,2, Helena Ferreira 1,2 and Nuno M. Neves 1,2,\***

1 3B's Research Group, I3Bs – Research Institute on Biomaterials, Biodegradables and Biomimetics, University of Minho, Headquarters of the European Institute of Excellence on Tissue Engineering and Regenerative Medicine, AvePark, Parque de Ciência e Tecnologia, Zona Industrial da Gandra, 4805-017 Barco, Guimarães, Portugal;

2 ICVS/3B's - PT Government Associate Laboratory, Braga/Guimarães, Portugal

3 TOXRUN – Toxicology Research Unit, University Institute of Health Sciences, CESPU, CRL Rua Central de Gandra, 1317, 4585-116 Gandra PRD, Portugal

4 Interdisciplinary Centre of Marine and Environmental Research (CIIMAR), University of Porto, Terminal de Cruzeiros do Porto de Leixões, Avenida General Norton de Matos, S/N, 4450-208 Matosinhos, Portugal

5 Laboratório de Química Orgânica e Farmacêutica, Departamento de Ciências Químicas, Faculdade de Farmácia da Universidade do Porto, Rua Jorge de Viterbo Ferreira 228, 4050-313 Porto, Portugal

\* Correspondence: M.E. T.: elizabeth.tiritan@iucs.cespu.pt; N.M.N.: nuno@i3bs.uminho.pt

**Table S1.** IUPAC name, chemical structure, CAS number, molecular formula, mass exact and pKa values of the water-soluble compounds identified in sardine, horse mackerel and sea bass roe-derived aqueous extracts.\*

| Compound    |              | IUPAC Name                                                                            | Chemical structure                                                                    | CAS Number | Molecular formula                                              | Mass exact (g/mol) | pKa   |        |
|-------------|--------------|---------------------------------------------------------------------------------------|---------------------------------------------------------------------------------------|------------|----------------------------------------------------------------|--------------------|-------|--------|
| Vitamins    | Nicotinamide | pyridine-3-carboxamide                                                                | 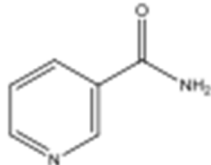   | 98-92-0    | C <sub>6</sub> H <sub>6</sub> N <sub>2</sub> O                 | 122.048013         | 13.39 | 3.63   |
|             | Riboflavin   | 7,8-dimethyl-10-[(2S,3S,4R)-2,3,4,5-tetrahydroxypentyl]benzo[g]pteridine-2,4-dione    |    | 83-88-5    | C <sub>17</sub> H <sub>20</sub> N <sub>4</sub> O <sub>6</sub>  | 376.138284         | 5.97  | - 2.60 |
|             | Thiamine     | 2-[3-[(4-amino-2-methylpyrimidin-5-yl)methyl]-4-methyl-1,3-thiazol-3-ium 5-yl]ethanol |     | 70-16-6    | C <sub>12</sub> H <sub>17</sub> N <sub>4</sub> OS <sup>+</sup> | 265.112307         | 15.50 | 5.54   |
| Amino acids | L-Tryptophan | (2S)-2-amino-3-(1H-indol-3-yl)propanoic acid                                          |  | 73-22-3    | C <sub>11</sub> H <sub>12</sub> N <sub>2</sub> O <sub>2</sub>  | 204.089878         | 2.54  | 9.40   |

|          |                  |                                                                        |                                                                                       |          |            |            |       |      |
|----------|------------------|------------------------------------------------------------------------|---------------------------------------------------------------------------------------|----------|------------|------------|-------|------|
|          | L-Histidine      | (2S)-2-amino-3-(1H-imidazol-5-yl)propanoic acid                        | 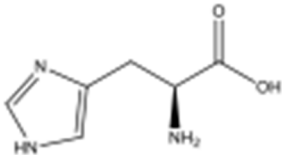   | 71-00-1  | C6H9N3O2   | 155.069477 | 1.85  | 9.44 |
|          | L- Phenylalanine | (2S)-2-amino-3-phenylpropanoic acid                                    |    | 63-91-2  | C9H11NO2   | 165.078979 | 2.47  | 9.45 |
|          | L-Isoleucine     | (2S,3S)-2-amino-3-methylpentanoic acid                                 |    | 73-32-5  | C6H13NO2   | 131.094629 | 2.79  | 9.59 |
|          | Taurine          | 2-aminoethanesulfonic acid                                             |    | 107-35-7 | C2H7NO3S   | 125.014664 | - 1.5 | 9.34 |
| Peptides | Anserine         | (2S)-2-(3-aminopropanoylamino)-3-(3-methylimidazol-4-yl)propanoic acid |    | 584-85-0 | C10H16N4O3 | 240.12224  | 7.15  |      |
|          | Carnosine        | (2S)-2-(3-aminopropanoylamino)-3-(1H-imidazol-5-yl)propanoic acid      |  | 305-84-0 | C9H14N4O3  | 226.10659  | 7.01  |      |

|                   |              |                                                                 |                                                                                     |            |                                                |            |      |        |
|-------------------|--------------|-----------------------------------------------------------------|-------------------------------------------------------------------------------------|------------|------------------------------------------------|------------|------|--------|
| Purine derivative | Hypoxanthine | 1,7-dihydropurin-6-one                                          | 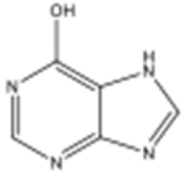 | 68-94-0    | C <sub>5</sub> H <sub>4</sub> N <sub>4</sub> O | 136.038511 | 8.72 | 1.73   |
|                   | Gadusol      | 3,4,5-trihydroxy-5-(hydroxymethyl)-2-methoxycyclohex-2-en-1-one |  | 76663-30-4 | C <sub>8</sub> H <sub>12</sub> O <sub>6</sub>  | 204.063388 | 7.07 | - 3.10 |

\*Data obtained from PubChem (IUPAC name, chemical structure, CAS number, molecular formula, mass exact) and Food DB (pKa values) databases, and from the manuscript of Perrone et al. (pKa values of anserine and carnosine) [1].

**A1**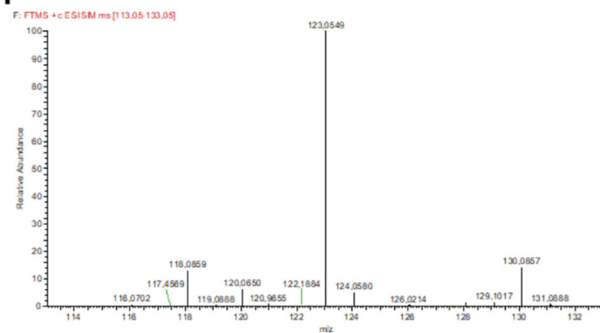**A2**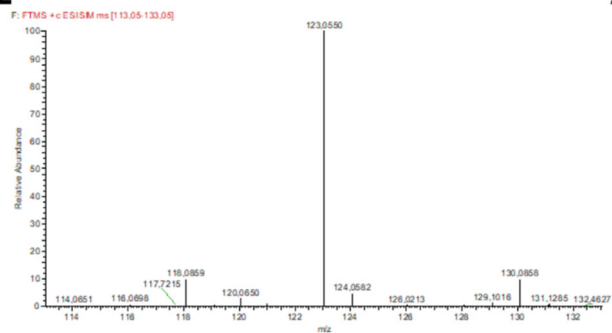**A3**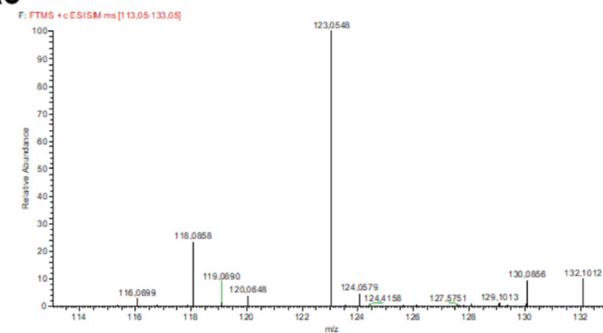**B1**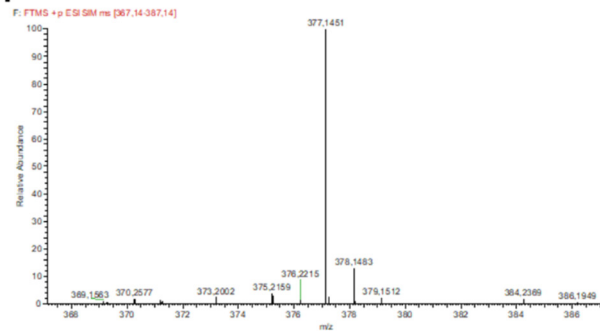**B2**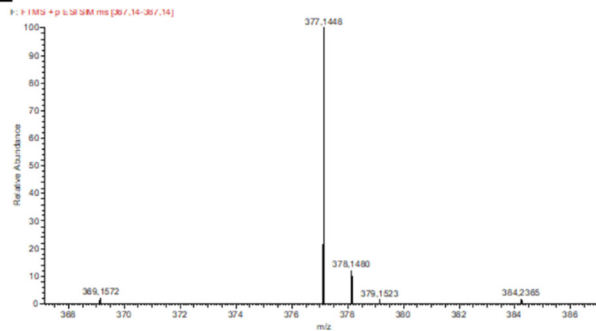**B3**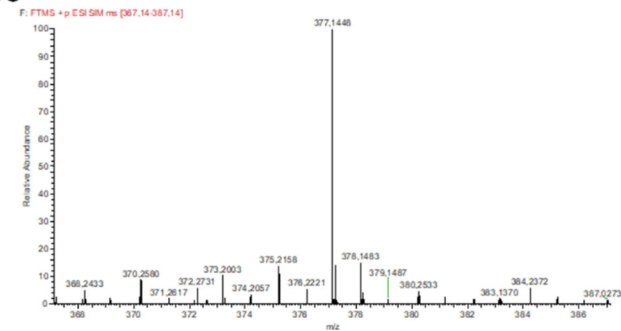**C1**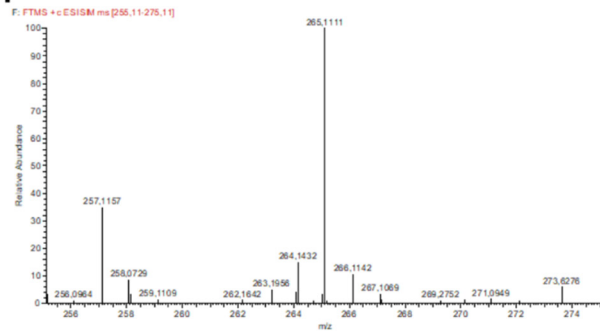**C2**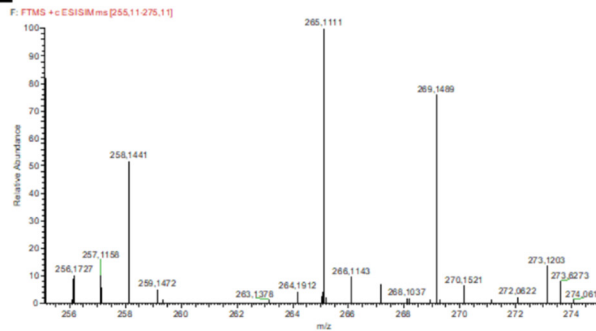**C3**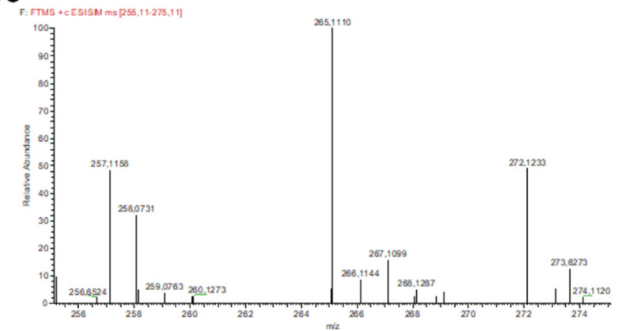

**D1**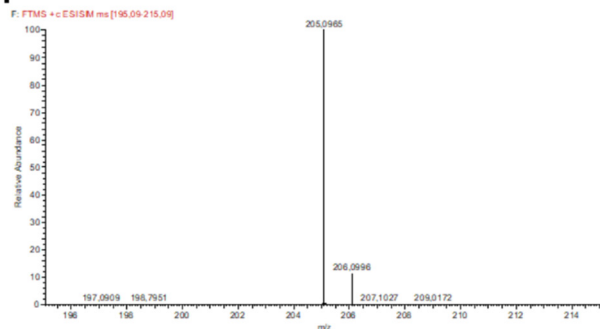**D2**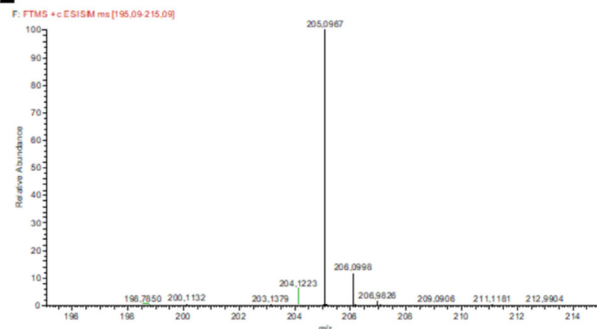**D3**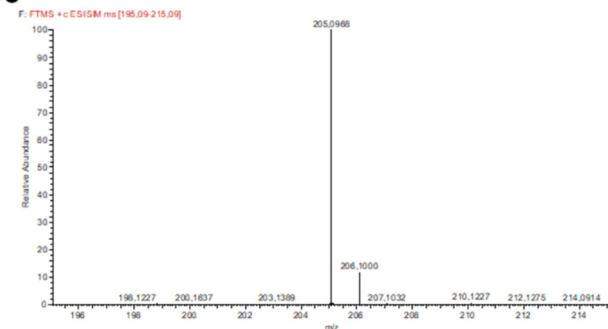**E1**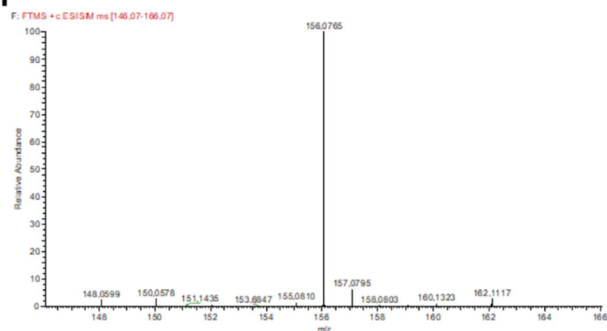**E2**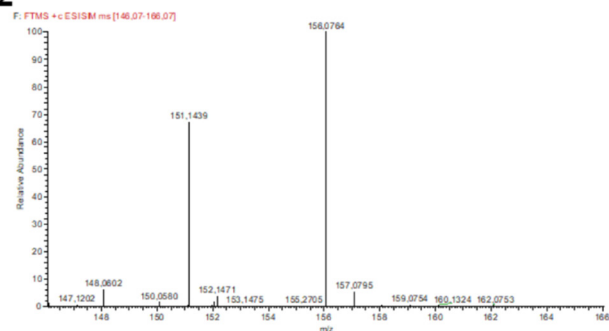**E3**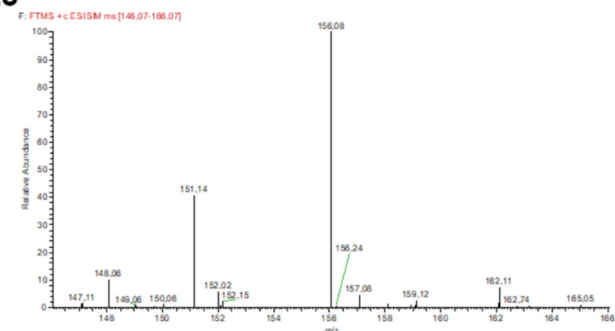**F1**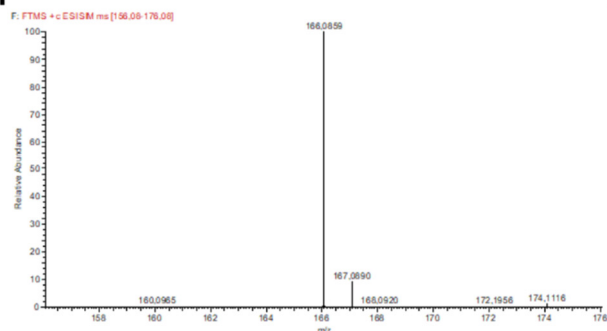**F2**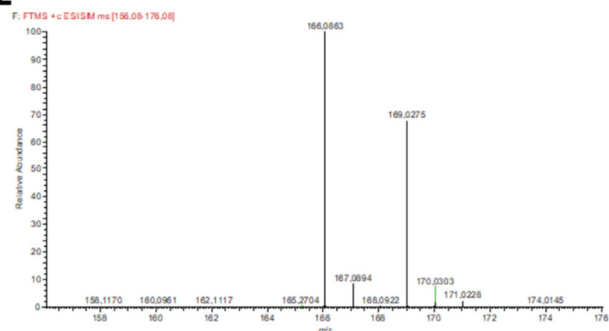**F3**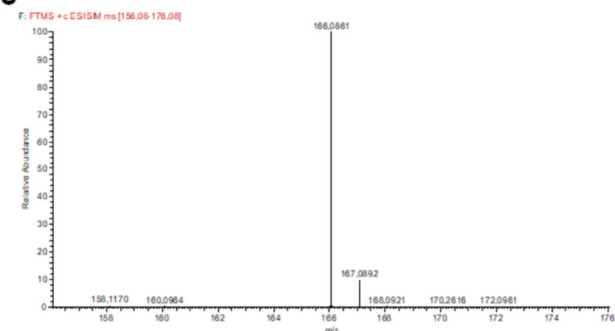

G1

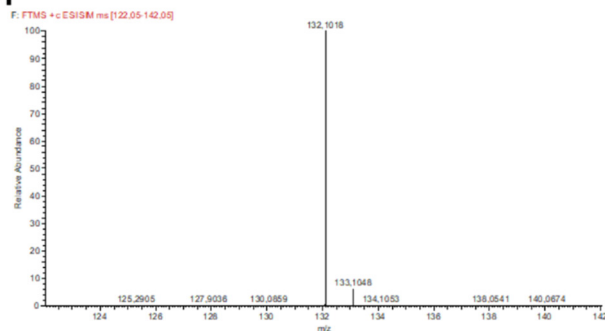

G2

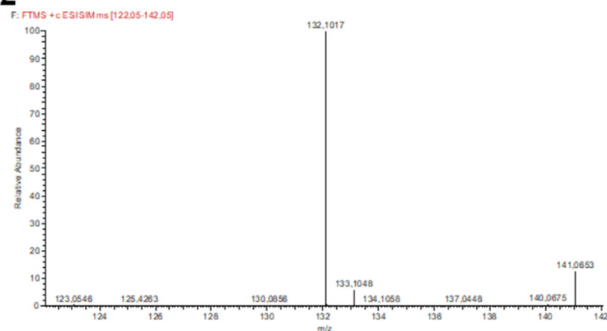

G3

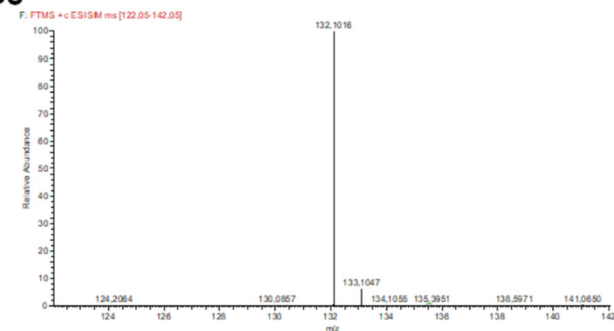

H1

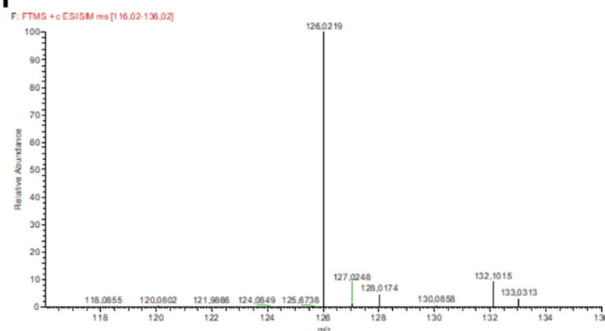

H2

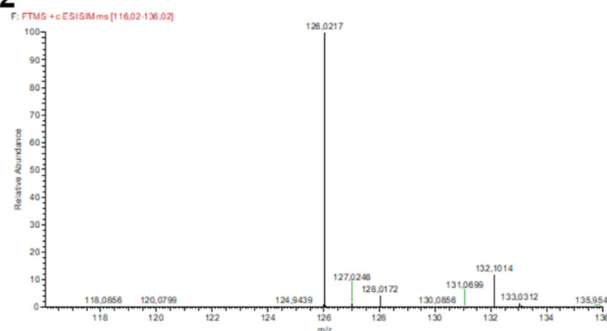

H3

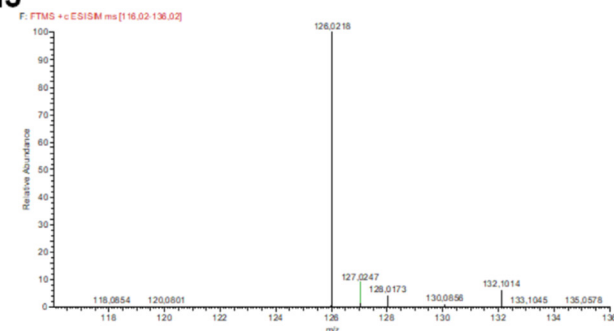

I1

Not detected

I2

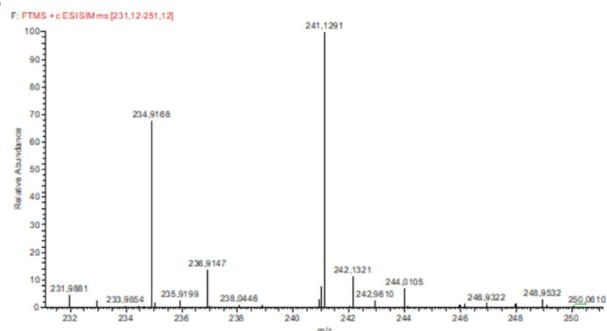

I3

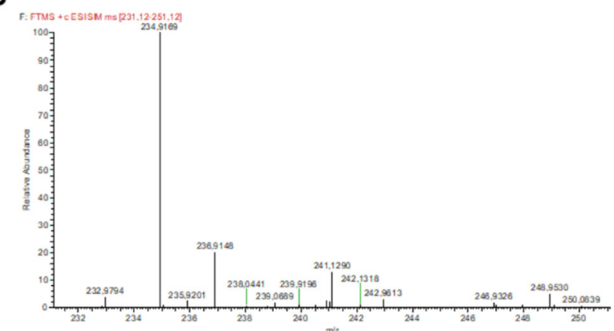

J1

Not detected

J2

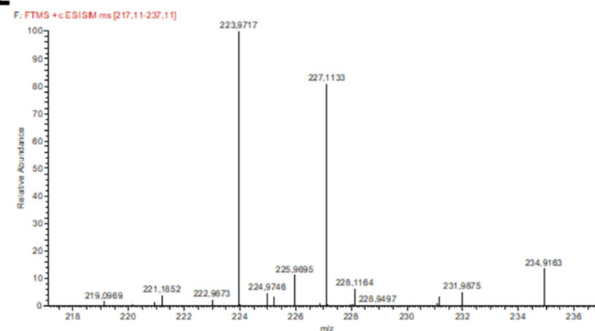

J3

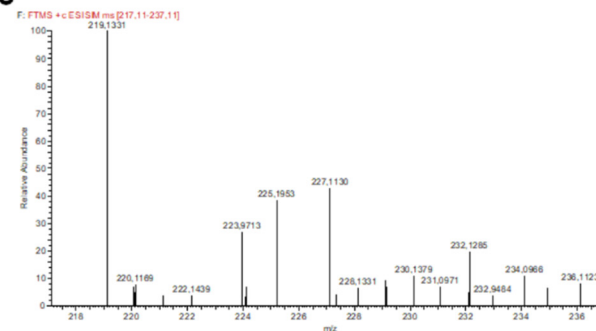

K1

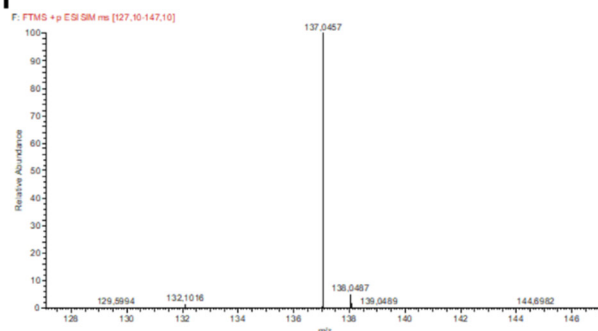

K2

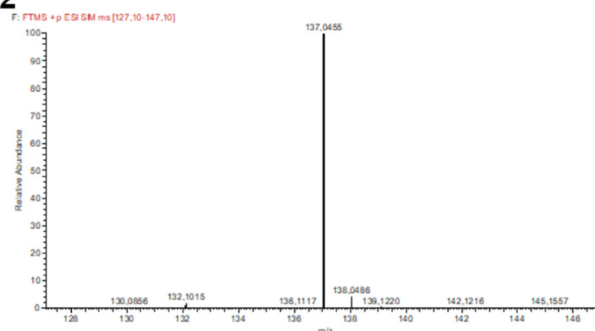

K3

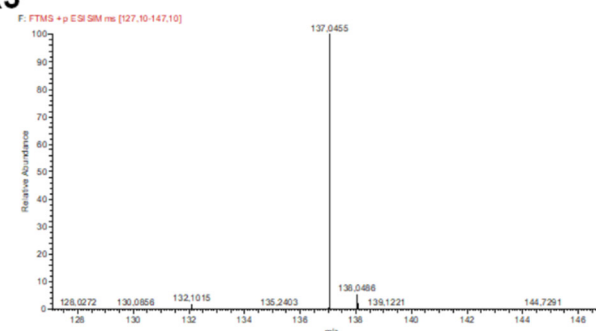

L1

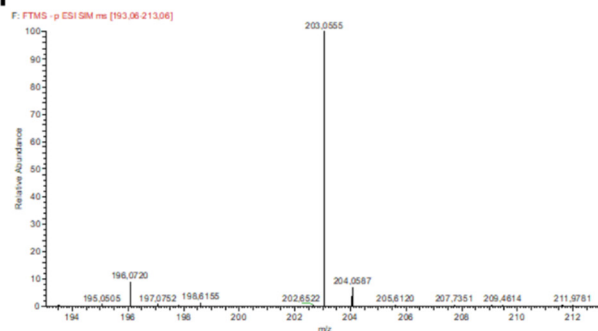

L2

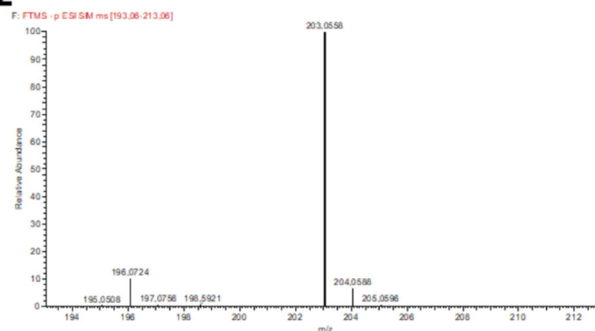

L3

Not detected

**Figure S1.** MS spectra of nicotinamide (A), riboflavin (B), thiamine (C), tryptophan (D), histidine (E), phenylalanine (F), isoleucine (G), taurine (H), anserine (I), carnosine (J), hypoxanthine (K) and gadusol (L) in the sardine (1), horse mackerel (2) and sea bass (3) roe-derived aqueous extracts.



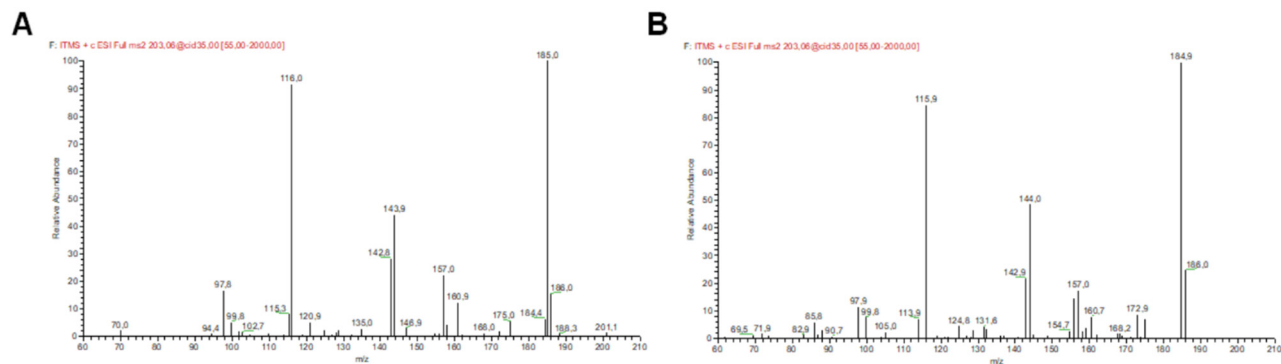

**Figure S2.** MS<sup>2</sup> spectra of gadusol in the sardine (A) and horse mackerel (B) roe-derived aqueous extracts.

## References

1. Perrone, D.; Monteiro, M.; Castelo-Branco, V.N. The Chemistry of Imidazole Dipeptides. In *Imidazole Dipeptides: Chemistry, Analysis, Function and Effects*, Preedy, V.R., Ed.; Food and Nutritional Components in Focus; 2015; Volume 8, pp. 43-60.
